# Supplementary material
Source: PubMed Central journal article supplement (PMC3858179)
Supplement: NIHMS529453-supplement-Elemental_analysis.pdf [file NIHMS529453-supplement-Elemental_analysis.pdf]

**The Effect of 5-Alkyl Modification on the Biological Activity of Pyrrolo[2,3-*d*]pyrimidine Containing Classical and Nonclassical Antifolates as Inhibitors of Dihydrofolate Reductase and as Antitumor and/or Antiopportunistic Infection Agents<sup>1a-e</sup>**

Aleem Gangjee,<sup>\*,†</sup> Hiteshkumar D. Jain,<sup>†,#</sup> Sherry F. Queener<sup>‡</sup> and Roy L. Kisliuk<sup>§</sup>

<sup>†</sup>Division of Medicinal Chemistry, Graduate School of Pharmaceutical Sciences, Duquesne University, Pittsburgh, PA 15282. <sup>‡</sup>Department of Pharmacology and Toxicology, School of Medicine, Indiana University, Indianapolis, Indiana 46202. <sup>§</sup>Department of Biochemistry, Tufts University School of Medicine, Boston, Massachusetts 02111.

**Supporting Information**

Elemental Analysis

**APPENDIX: Elemental Analysis**

| Compd | Calculated |      |       |       |       | Found |      |       |       |       |
|-------|------------|------|-------|-------|-------|-------|------|-------|-------|-------|
|       | C          | H    | N     | S     | Cl    | C     | H    | N     | S     | Cl    |
| 3     | 51.42      | 5.34 | 17.13 | 6.54  |       | 51.41 | 5.32 | 17.11 | 6.55  |       |
| 4     | 47.35      | 5.07 | 15.20 | 5.80  |       | 47.71 | 5.28 | 14.81 | 5.77  |       |
| 11    | 46.89      | 3.94 | 18.02 | 8.25  | 22.90 | 46.80 | 3.98 | 18.07 | 8.25  | 23.03 |
| 12    | 60.98      | 6.80 | 20.20 | 9.25  |       | 60.76 | 6.84 | 20.12 | 9.18  |       |
| 13    | 59.46      | 5.79 | 23.11 | 10.58 |       | 59.25 | 5.68 | 22.95 | 10.45 |       |
| 14    | 56.78      | 5.96 | 20.69 | 9.48  |       | 56.89 | 5.69 | 20.68 | 9.45  |       |
| 15    | 56.81      | 5.89 | 19.48 | 8.92  |       | 56.5  | 5.95 | 19.40 | 8.93  |       |
| 16    | 53.89      | 5.57 | 18.27 | 8.37  |       | 54.12 | 5.68 | 18.34 | 8.60  |       |
| 17    | 65.30      | 5.48 | 20.04 | 9.18  |       | 64.95 | 5.54 | 19.97 | 9.14  |       |
| 18    | 63.66      | 5.62 | 19.54 | 8.95  |       | 63.94 | 5.40 | 19.73 | 9.01  |       |
| 19    | 48.21      | 4.21 | 18.74 | 8.58  | 18.97 | 48.31 | 4.13 | 18.77 | 8.62  | 18.93 |
| 20    | 61.68      | 6.52 | 21.15 | 9.69  |       | 61.58 | 6.52 | 20.95 | 9.58  |       |
| 21    | 60.83      | 6.02 | 22.74 | 10.41 |       | 60.79 | 5.85 | 22.62 | 10.33 |       |
| 22    | 58.02      | 5.84 | 21.14 | 9.68  |       | 57.66 | 5.86 | 20.96 | 9.60  |       |
| 23    | 56.81      | 5.89 | 19.48 | 8.92  |       | 56.61 | 5.92 | 19.22 | 8.92  |       |
| 24    | 55.42      | 6.02 | 19.01 | 8.70  |       | 55.31 | 5.76 | 18.75 | 8.66  |       |
| 25    | 65.30      | 5.48 | 20.04 | 9.18  |       | 65.08 | 5.54 | 19.96 | 9.23  |       |
| 26    | 65.30      | 5.48 | 20.04 | 9.18  |       | 64.96 | 5.50 | 19.64 | 9.21  |       |
| 27    | 48.92      | 4.11 | 19.02 | 8.71  | 19.25 | 48.82 | 4.07 | 18.84 | 8.83  | 18.97 |
| 30    | 63.98      | 6.71 | 18.65 |       |       | 64.03 | 6.77 | 18.71 |       |       |
| 31    | 56.00      | 6.89 | 36.28 |       |       | 55.96 | 6.85 | 36.35 |       |       |
| 32    | 58.20      | 5.70 | 18.85 | 8.63  |       | 58.1  | 5.82 | 18.78 | 8.60  |       |
| 34    | 56.80      | 6.10 | 15.90 | 6.07  |       | 56.54 | 6.14 | 15.98 | 5.93  |       |
| 37    | 63.98      | 6.71 | 18.65 |       |       | 64.03 | 6.74 | 18.74 |       |       |
| 38    | 56.53      | 6.85 | 36.62 |       |       | 56.41 | 6.81 | 36.62 |       |       |
| 39    | 57.09      | 5.80 | 18.49 | 8.47  |       | 56.9  | 5.49 | 18.82 | 8.75  |       |
| 41    | 55.85      | 6.19 | 15.63 | 5.96  |       | 56.07 | 6.08 | 15.80 | 5.97  |       |
